# Supplementary material for: Anthraquinone-Polyaniline-Integrated Textile Platforms for In Situ Electrochemical Production of Hydrogen Peroxide for Microbial Deactivation
Source: MDPI journal article supplement (doi:10.3390/polym15132859), 2023-06-28
Supplement: s1 [file s1]

Article

# Anthraquinone-Polyaniline-Integrated Textile Platforms for In Situ Electrochemical Production of Hydrogen Peroxide for Microbial Deactivation

Samuel M. Mugo \*, Weihao Lu and Scott Robertson

Physical Sciences Department, MacEwan University, 10700-104 Avenue, Edmonton, AB T5J 4S2, Canada; luw6@mymacewan.ca (W.L.); robertsons57@mymacewan.ca (S.R.)

\* Correspondence: mугos@macewan.ca; Tel.: +1-780-633-3493; Fax: +1-780-497-5655

## Supporting Information

a) CNT/CNC@textile patch

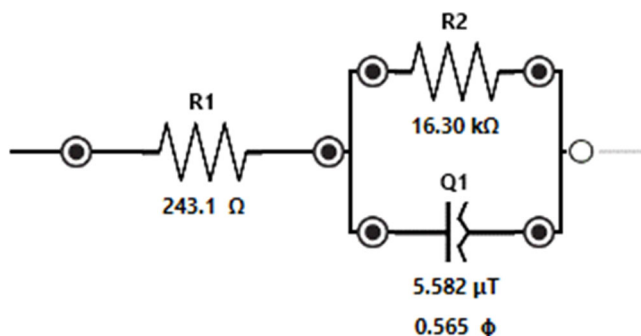

b) PANI@CNT/CNC@textile patch

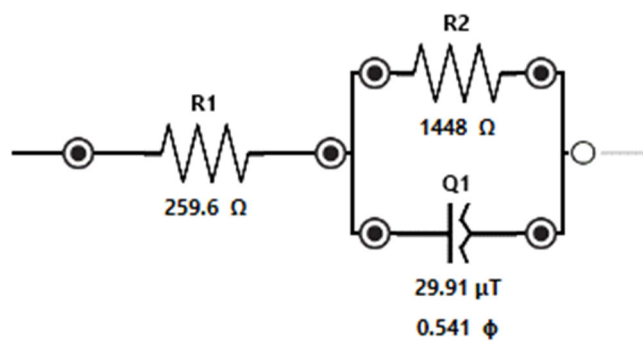

c) AQ@CNT/CNC@textile patch

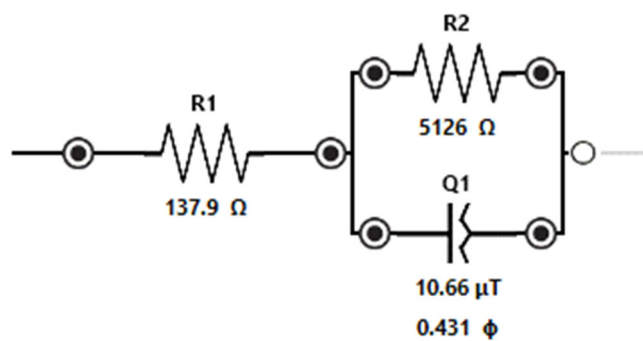

d) AQ@PANI@CNT/CNC@textile antibacterial patch

**Figure S1.** EIS circuit fitting for different variations of the fabricated patches.

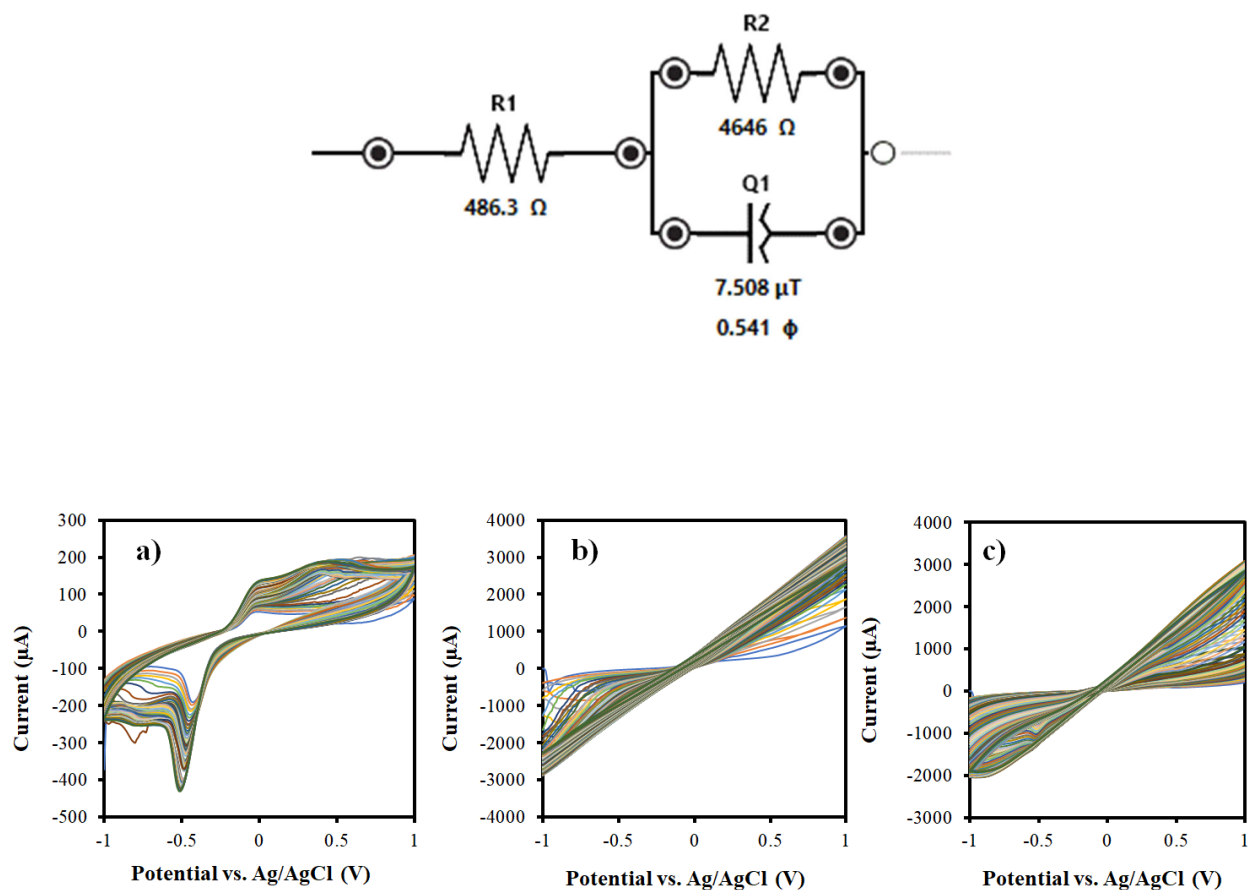

**Figure S2.** Overlaid CVs taken using **a)** CNT/CNC@textile; **b)** PANI@CNT/CNC@textile; and **c)** AQ@PANI@CNT/CNC@textile patches to stimulate the electrochemical production of  $\text{H}_2\text{O}_2$ .

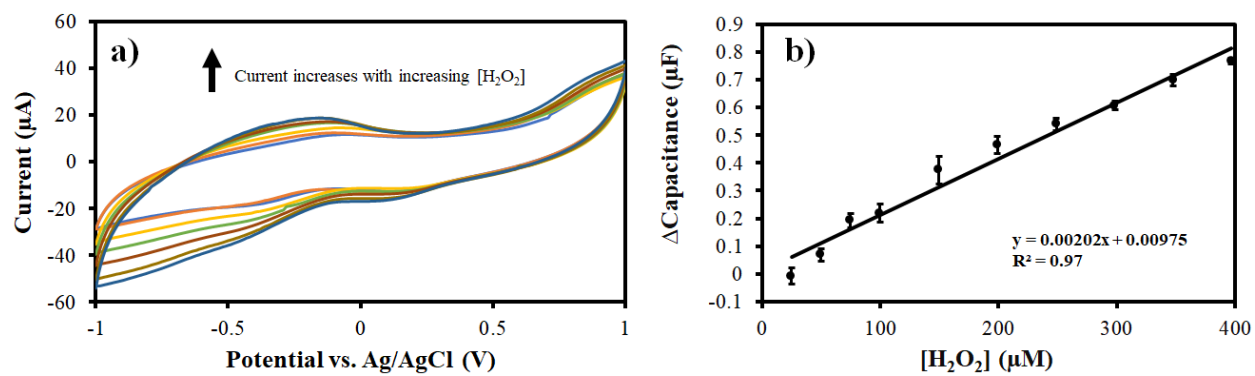

**Figure S3.** **a)** Overlaid CVs taken using the CNT/CNC sensor electrode in response to increasing  $\text{H}_2\text{O}_2$  concentrations and **b)** resulting  $\Delta\text{capacitance}$  vs.  $\text{H}_2\text{O}_2$  concentration calibration curve.

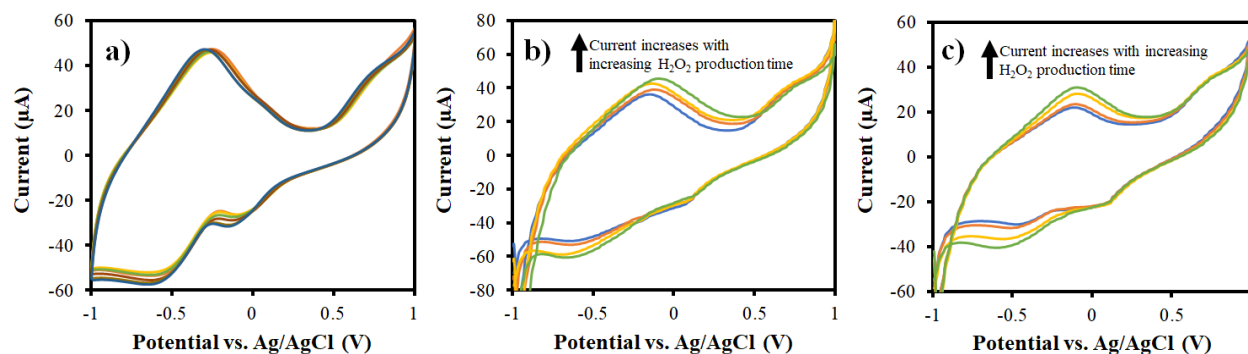

**Figure S4.** CVs taken using the CNT/CNC sensor electrode for the electrochemical detection of  $\text{H}_2\text{O}_2$  produced from **a)** CNT/CNC@textile; **b)** PANI@CNT/CNC@textile; and **c)** AQ@PANI@CNT/CNC@textile patches.

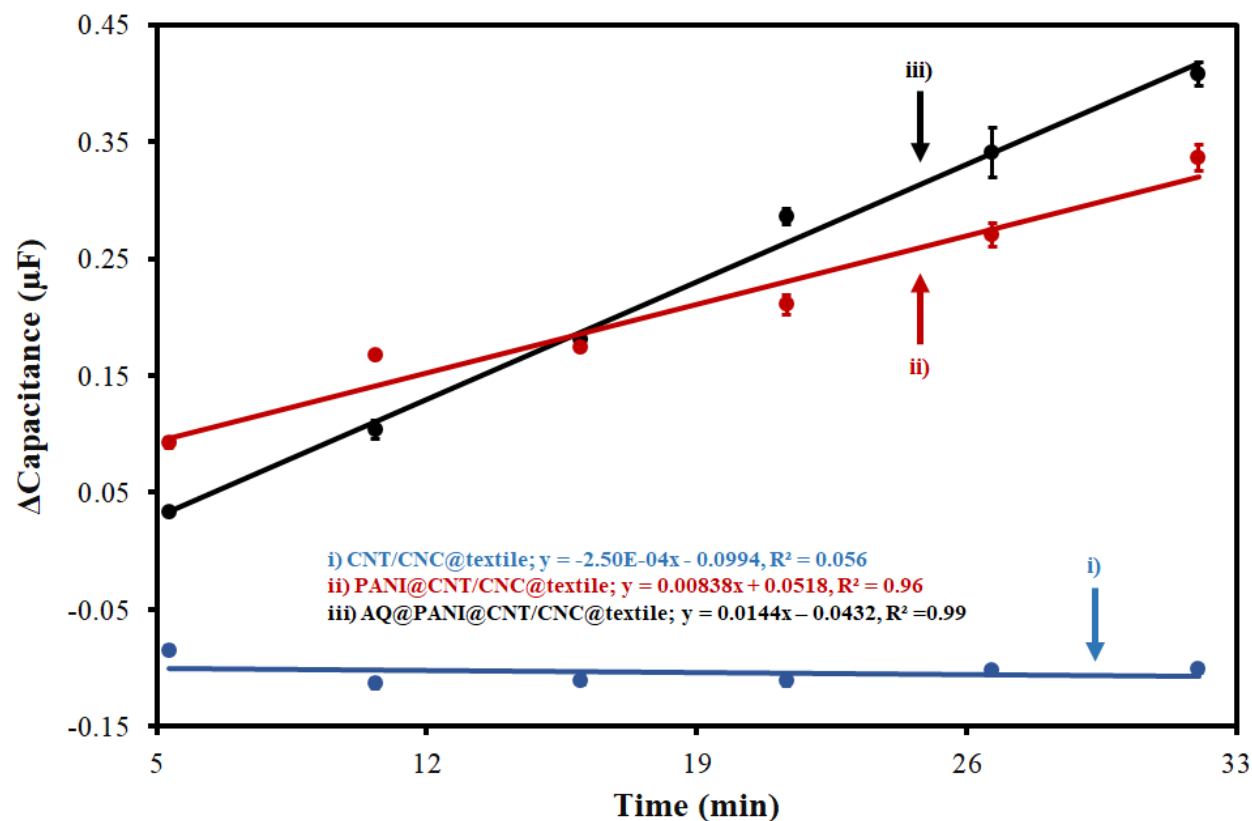

**Figure S5.**  $\Delta$ Capacitance vs.  $\text{H}_2\text{O}_2$  generation time plot, and resulting linear equations for  
i) CNT/CNC@textile; ii) PANI@CNT/CNC@textile; and iii) AQ@PANI@CNT/CNC@textile patches.

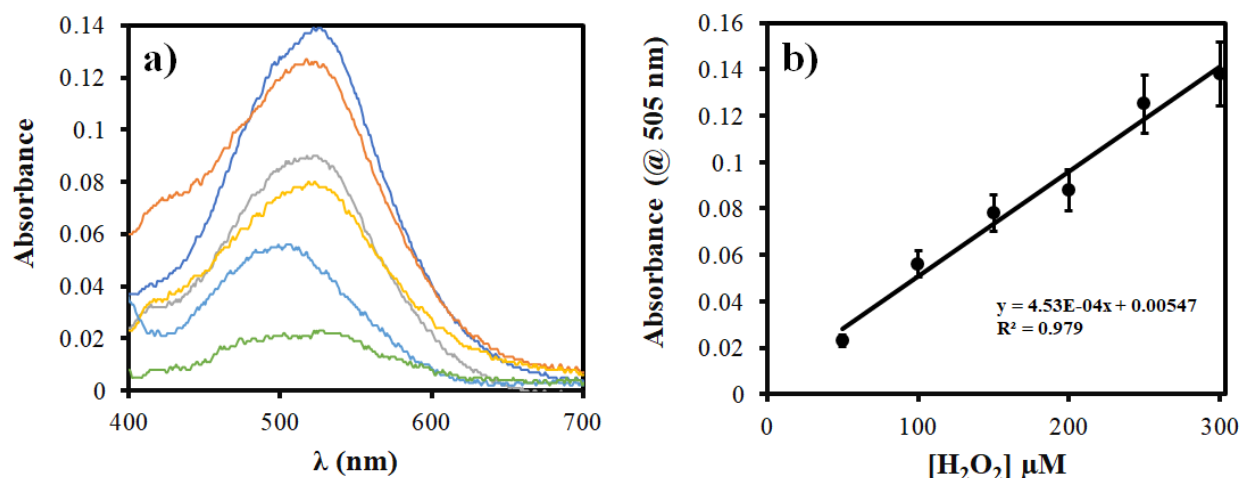

**Figure S6.** **a)** Absorption spectra for the colorimetric detection of  $\text{H}_2\text{O}_2$  in response to increasing  $\text{H}_2\text{O}_2$  concentrations and **b)** resulting absorbance (@ 505 nm) vs.  $\text{H}_2\text{O}_2$  concentration calibration curve.

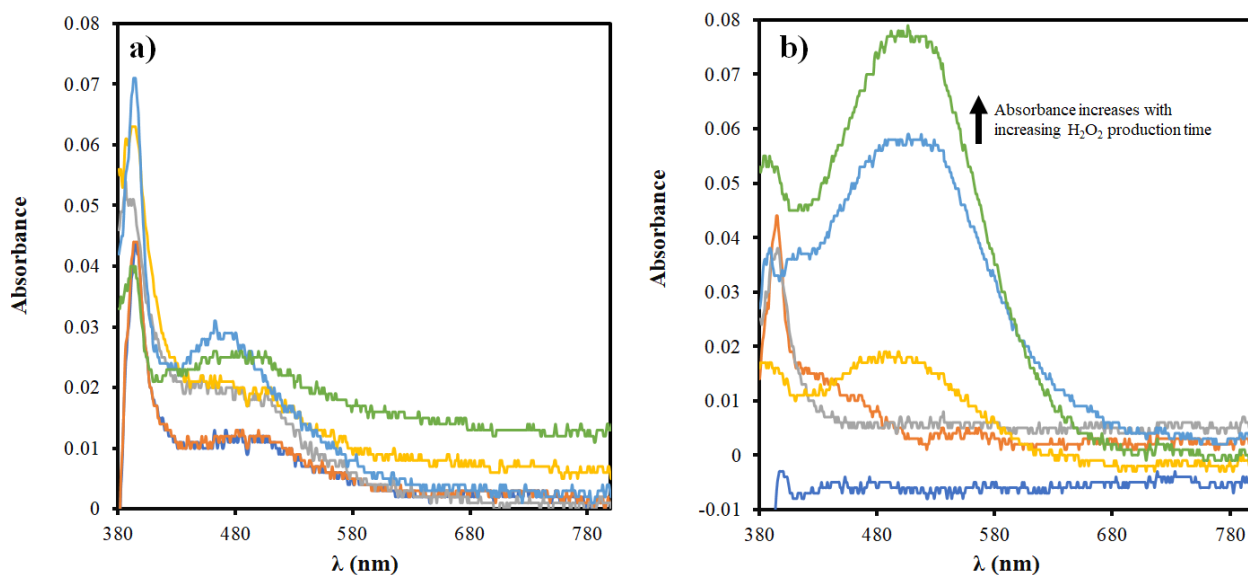

**Figure S7.** Absorption spectra for the colorimetric detection of  $\text{H}_2\text{O}_2$  produced from **a)** PANI@CNT/CNC@textile; and **b)** AQ@PANI@CNT/CNC@textile patches.

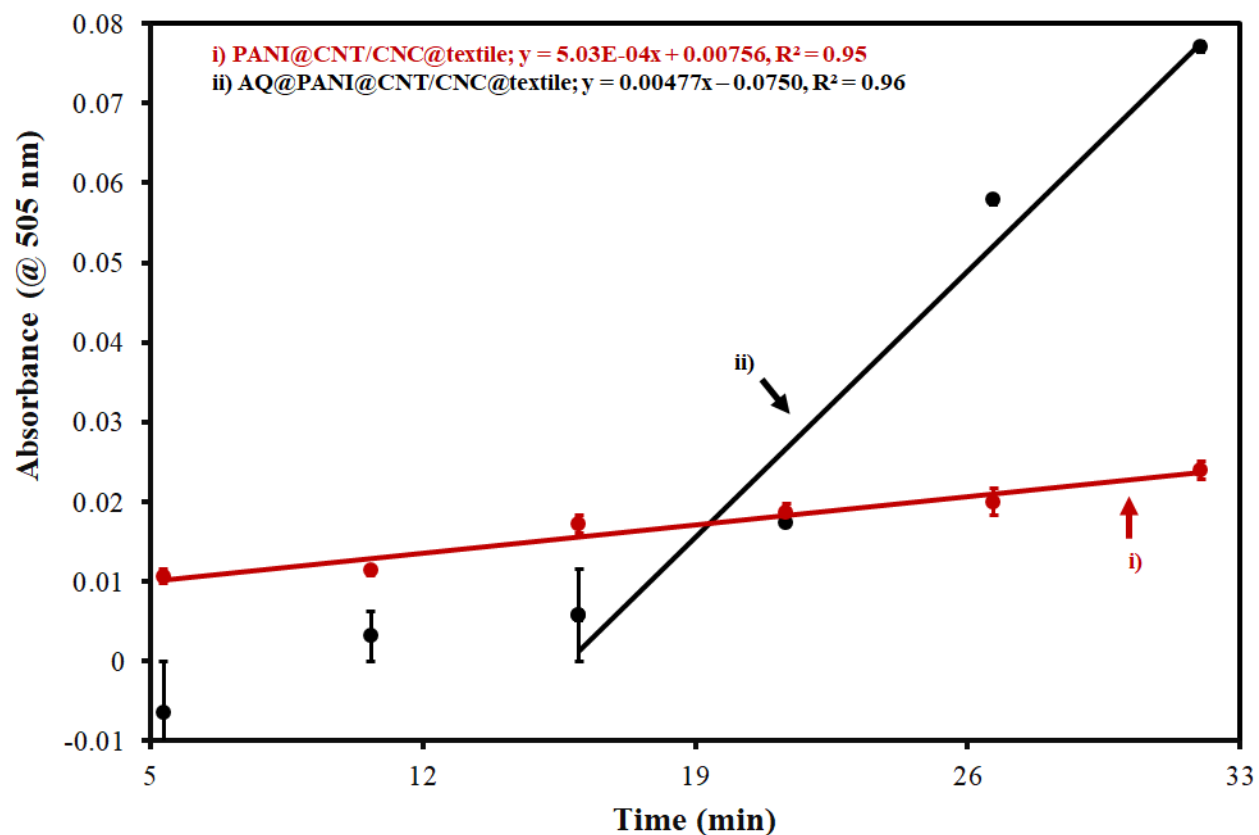

**Figure S8.** Absorbance (@ 505 nm) vs. electrochemical  $H_2O_2$  generation time plot and resulting linear equations for **i)** PANI@CNT/CNC@textile; and **ii)** AQ@PANI@CNT/CNC@textile patches.

| Time (min) | CNT/CNC@textile                                                                     | PANI@CNT/CNC@textile                                                                 | AQ@PANI@CNT/CNC@textile                                                               |
|------------|-------------------------------------------------------------------------------------|--------------------------------------------------------------------------------------|---------------------------------------------------------------------------------------|
| 0          |  |  |  |



|    |                                                                                     |                                                                                      |                                                                                       |                                                                                       |
|----|-------------------------------------------------------------------------------------|--------------------------------------------------------------------------------------|---------------------------------------------------------------------------------------|---------------------------------------------------------------------------------------|
| 5  | 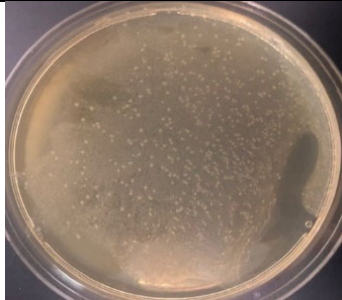   |    |    |                                                                                       |
| 11 |    |    |    |                                                                                       |
| 16 |   |   |   |                                                                                       |
| 21 | N/A                                                                                 |                                                                                      |   |  |
| 27 |  |  |  |                                                                                       |

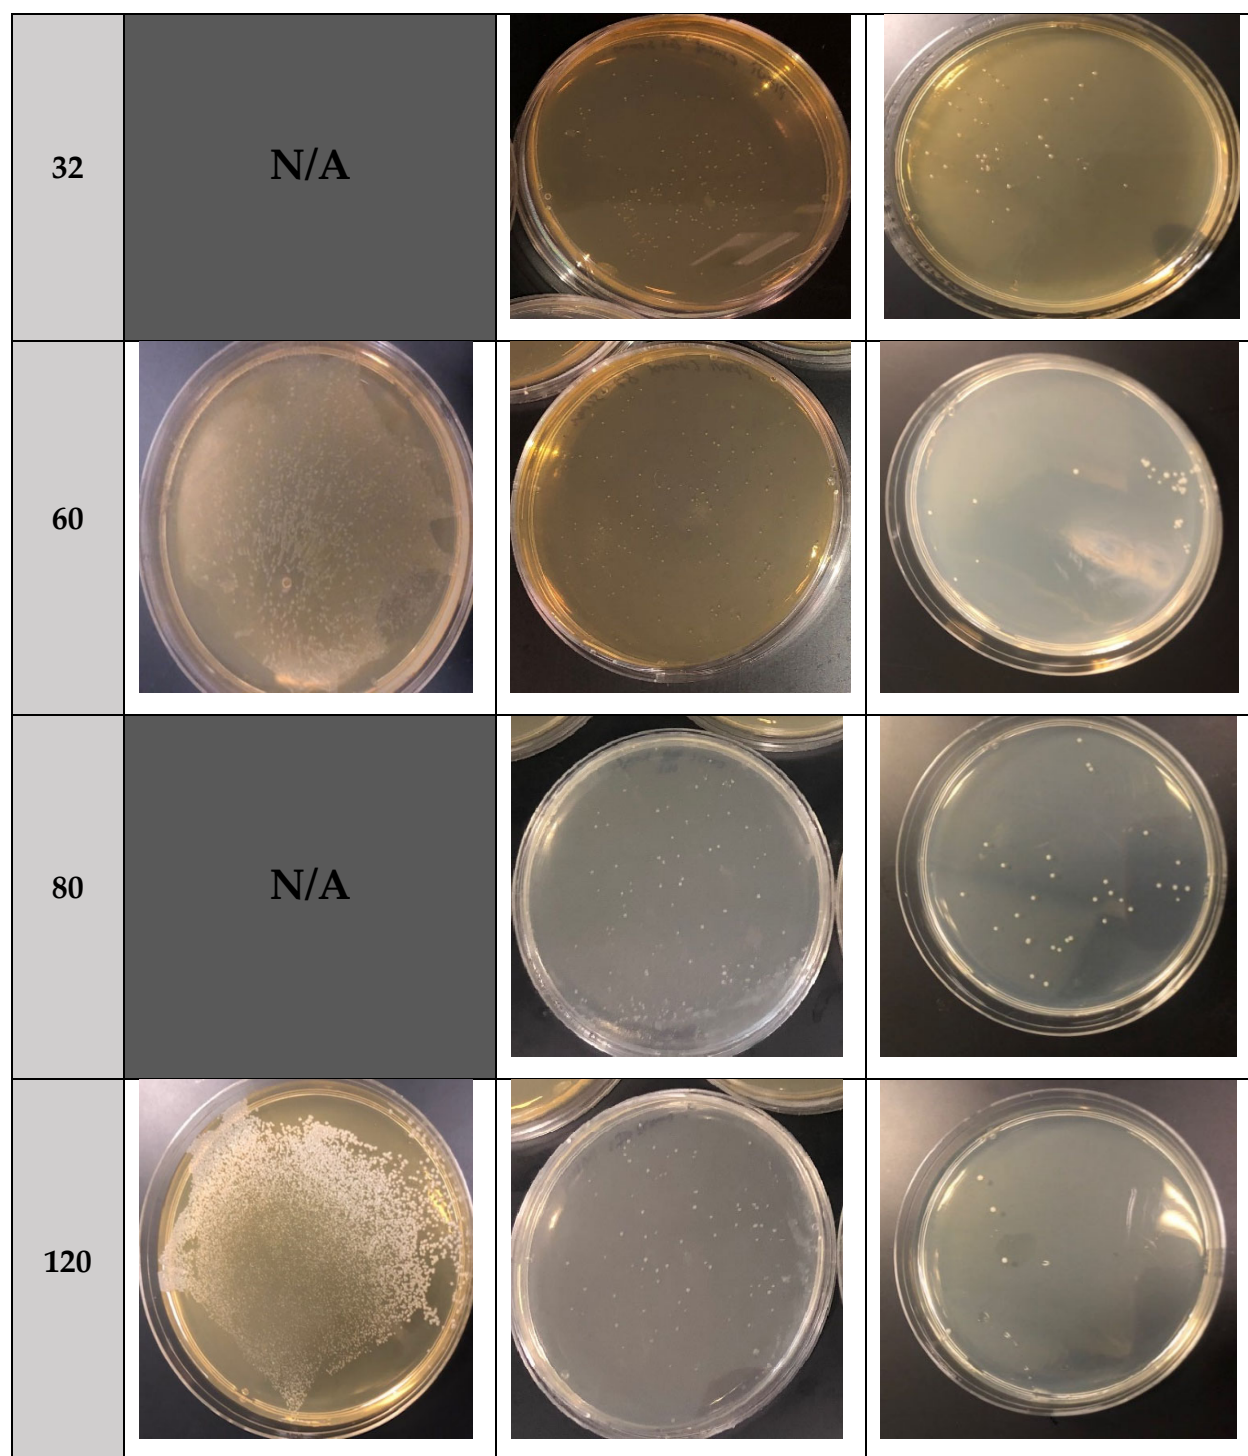

**Figure S9.** Camera images of *E. coli* colonies taken following various lengths of exposure to  $\text{H}_2\text{O}_2$  production from CNT/CNC@textile, PANI@CNT/CNC@textile, and AQ@PANI@CNT/CNC@textile patches.
